# Supplementary material
Source: publisher figshare collection journal article supplement (https://rs.figshare.com/ndownloader/files/23595425)
Supplement: Supplementary file 1 [file 23595425]

## Sheet: NFHDEC Data
Year	Contest	Competitor ID	Last Name	First Name	Sex	Number of Hot Dogs	Contest Place	Contest Duration	Rate (hot dogs / min)	ACR (g/min)	Overall Place (Combined Sexes)	Number Contest	Total Number of NFHDEC Competitions	RecordID	Dataset Rank
1980	Mixed	127	Siderman	Paul	M	9	1	10	0.9	90	1	1	1	1	380
1982	Mixed	1	Abrams	Steven	M	11	1	10	1.1	110	1	1	1	2	360
1983	Mixed	54	Gomez	Emil	M	10.5	1	10	1.05	105	1	1	1	3	367
1984	Mixed	48	Felden	Birgit	F	9.5	1	10	0.95	95	1	1	1	4	378
1985	Mixed	113	Rodriguez	Oscar	M	11.75	1	12	0.979167	97.9167	1	1	1	5	377
1986	Mixed	61	Heller	Mark	M	15.5	1	10	1.55	155	1	1	1	6	317
1987	Mixed	146	Wolfman	Don	M	13.5	1	10	1.35	135	1	1	1	7	340
1988	Mixed	57	Green	Jay	M	10	1	12	0.833333	83.3333	1	1	4	8	389
1989	Mixed	57	Green	Jay	M	15.5	1	12	1.29167	129.167	1	2	4	9	345
1990	Mixed	39	DeVito	Mike	M	15	1	12	1.25	125	1	1	6	10	346
1990	Mixed	57	Green	Jay	M	15	1	12	1.25	125	1	3	4	11	346
1991	Mixed	35	Dellarosa	Frank	M	21	1	12	1.75	175	1	1	2	12	278
1991	Mixed	57	Green	Jay	M	8	Unk	12	0.666667	66.6667	Unknown	4	4	13	412
1992	Mixed	35	Dellarosa	Frank	M	20	1	12	1.66667	166.667	1	2	2	14	290
1992	Mixed	39	DeVito	Mike	M	15	2	12	1.25	125	2	2	6	15	346
1993	Mixed	39	DeVito	Mike	M	17	1	12	1.41667	141.667	1	3	6	16	329
1993	Mixed	56	Gotay	Joey	M	14.5	2	12	1.20833	120.833	2	1	1	17	355
1993	Mixed	44	Dykstra	Willie	M	7.5	Unk	12	0.625	62.5	Unknown	1	1	18	415
1994	Mixed	39	DeVito	Mike	M	20	1	12	1.66667	166.667	1	4	6	19	290
1994	Mixed	70	Karchie	Ed	M	18	2	12	1.5	150	2	1	5	20	320
1994	Mixed	129	Sliwa	Curtis	M	13	3	12	1.08333	108.333	3	1	2	21	366
1995	Mixed	70	Karchie	Ed	M	19.5	1	12	1.625	162.5	1	2	5	22	300
1995	Mixed	39	DeVito	Mike	M	19	2	12	1.58333	158.333	2	5	6	23	311
1996	Mixed	70	Karchie	Ed	M	22	1	12	1.83333	183.333	1	3	5	24	269
1996	Mixed	39	DeVito	Mike	M	20	2	12	1.66667	166.667	2	6	6	25	290
1997	Mixed	91	Nakajima	Hirofumi	M	24.5	1	12	2.04167	204.167	1	1	3	26	242
1997	Mixed	8	Arai	Kazutoyo	M	24	2	12	2	200	2	1	3	27	244
1997	Mixed	70	Karchie	Ed	M	20	3	12	1.66667	166.667	3	4	5	28	290
1997	Mixed	122	Serrano	Joey	M	15	Unk	12	1.25	125	Unknown	1	1	29	346
1997	Mixed	129	Sliwa	Curtis	M	15	Unk	12	1.25	125	Unknown	2	2	30	346
1998	Mixed	91	Nakajima	Hirofumi	M	19	1	12	1.58333	158.333	1	2	3	31	311
1998	Mixed	58	Hardy	Charles	M	17.5	2	12	1.45833	145.833	2	1	6	32	327
1998	Mixed	70	Karchie	Ed	M	14	3	12	1.16667	116.667	3	5	5	33	359
1998	Mixed	94	Noble	Barry	M	10	Unk	12	0.833333	83.3333	Unknown	1	1	34	389
1999	Mixed	72	Keiner	Steve	M	20.25	1	12	1.6875	168.75	1	1	2	35	287
1999	Mixed	58	Hardy	Charles	M	20	2	12	1.66667	166.667	2	2	6	36	290
1999	Mixed	135	Tadusz	Bartoszek	M	20	2	12	1.66667	166.667	2	1	1	37	290
1999	Mixed	53	Goldstein	Syd	M	19.5	4	12	1.625	162.5	4	1	1	38	300
1999	Mixed	91	Nakajima	Hirofumi	M	19	5	12	1.58333	158.333	5	3	3	39	311
2000	Mixed	8	Arai	Kazutoyo	M	25.125	1	12	2.09375	209.375	1	2	3	40	236
2000	Mixed	49	Fujita	Misao	M	24	2	12	2	200	2	1	1	41	244
2000	Mixed	4	Akasaka	Takako	M	22.25	3	12	1.85417	185.417	3	1	1	42	266
2000	Mixed	3	Addicks	Steve	M	21	4	12	1.75	175	4	1	1	43	278
2000	Mixed	58	Hardy	Charles	M	19	5	12	1.58333	158.333	5	3	6	44	311
2000	Mixed	72	Keiner	Steve	M	15	Unk	12	1.25	125	Unknown	2	2	45	346
2001	Mixed	73	Kobayashi	Takeru	M	50	1	12	4.16667	416.667	1	1	9	46	47
2001	Mixed	8	Arai	Kazutoyo	M	31	2	12	2.58333	258.333	2	3	3	47	175
2001	Mixed	58	Hardy	Charles	M	23	3	12	1.91667	191.667	3	4	6	48	257
2001	Mixed	14	Booker	Eric	M	19.5	Unk	12	1.625	162.5	Unknown	1	15	49	300
2002	Mixed	73	Kobayashi	Takeru	M	50	1	12	4.16667	416.667	1	2	9	50	47
2002	Mixed	14	Booker	Eric	M	26	2	12	2.16667	216.667	2	2	15	51	223
2002	Mixed	150	Zhornitskiy	Oleg	M	25	3	12	2.08333	208.333	3	1	1	52	237
2002	Mixed	79	LeFevre	Rich	M	24.5	4	12	2.04167	204.167	4	1	8	53	242
2002	Mixed	58	Hardy	Charles	M	20	5	12	1.66667	166.667	5	5	6	54	290
2002	Mixed	32	Conti	Crazy Legs	M	18	6	12	1.5	150	6	1	8	55	320
2002	Mixed	69	Jarvis	Ed	M	17	7	12	1.41667	141.667	7	1	4	56	329
2002	Mixed	119	Schaefer	Don	M	12	8	12	1	100	8	1	1	57	372
2003	Mixed	73	Kobayashi	Takeru	M	44.5	1	12	3.70833	370.833	1	3	9	58	69
2003	Mixed	69	Jarvis	Ed	M	30.5	2	12	2.54167	254.167	2	2	4	59	180
2003	Mixed	14	Booker	Eric	M	29	3	12	2.41667	241.667	3	3	15	60	196
2003	Mixed	138	Thomas	Sonya	F	25	4	12	2.08333	208.333	4	1	15	61	237
2004	Mixed	73	Kobayashi	Takeru	M	53.5	1	12	4.45833	445.833	1	4	9	62	39
2004	Mixed	125	Shirota	Nobuyuki	M	38	2	12	3.16667	316.667	2	1	1	63	106
2004	Mixed	138	Thomas	Sonya	F	32	3	12	2.66667	266.667	3	2	15	64	164
2004	Mixed	79	LeFevre	Rich	M	27.75	4	12	2.3125	231.25	4	2	8	65	206
2004	Mixed	69	Jarvis	Ed	M	27	5	12	2.25	225	6	3	4	66	212
2004	Mixed	14	Booker	Eric	M	27	6	12	2.25	225	5	4	15	67	212
2004	Mixed	78	LeFevre	Carlene	F	22	7	12	1.83333	183.333	7	1	5	68	269
2004	Mixed	105	Reeves	Jim	M	21	8	12	1.75	175	8	1	4	69	278
2004	Mixed	76	LaRue	Joey	M	20	9	12	1.66667	166.667	9	1	2	70	290
2004	Mixed	52	Goldstein	Allen	M	19	10	12	1.58333	158.333	10	1	2	71	311
2005	Mixed	73	Kobayashi	Takeru	M	49	1	12	4.08333	408.333	1	5	9	72	52
2005	Mixed	138	Thomas	Sonya	F	37	2	12	3.08333	308.333	2	3	15	73	117
2005	Mixed	26	Chestnut	Joey	M	32	3	12	2.66667	266.667	3	1	15	74	164
2005	Mixed	69	Jarvis	Ed	M	29	4	12	2.41667	241.667	4	4	4	75	196
2005	Mixed	95	Oguni	Kenji		29	5	12	2.41667	241.667	5	1	1	76	196
2005	Mixed	79	LeFevre	Rich	M	25.5	6	12	2.125	212.5	6	3	8	77	228
2005	Mixed	78	LeFevre	Carlene	F	25	7	12	2.08333	208.333	7	2	5	78	237
2005	Mixed	110	Roch	Ron	M	23	8	12	1.91667	191.667	8	1	1	79	257
2005	Mixed	68	Janus	Tim	M	22.5	9	12	1.875	187.5	9	1	10	80	265
2005	Mixed	14	Booker	Eric	M	22	10	12	1.83333	183.333	10	5	15	81	269
2005	Mixed	58	Hardy	Charles	M	22	11	12	1.83333	183.333	11	6	6	82	269
2005	Mixed	102	Philbin	Pat	M	20	12	12	1.66667	166.667	12	1	3	83	290
2005	Mixed	32	Conti	Crazy Legs	M	19	13	12	1.58333	158.333	13	2	8	84	311
2005	Mixed	76	LaRue	Joey	M	18	14	12	1.5	150	14	2	2	85	320
2005	Mixed	81	Lerman	Don	M	15	15	12	1.25	125	15	1	1	86	346
2005	Mixed	21	Burns	Rob	M	10	16	12	0.833333	83.3333	16	1	1	87	389
2006	Mixed	73	Kobayashi	Takeru	M	53.75	1	12	4.47917	447.917	1	6	9	88	38
2006	Mixed	26	Chestnut	Joey	M	52	2	12	4.33333	433.333	2	2	15	89	42
2006	Mixed	138	Thomas	Sonya	F	37	3	12	3.08333	308.333	3	4	15	90	117
2007	Mixed	26	Chestnut	Joey	M	66	1	12	5.5	550	1	3	15	91	18
2007	Mixed	73	Kobayashi	Takeru	M	63	2	12	5.25	525	2	7	9	92	24
2007	Mixed	10	Bertoletti	Pat	M	49	3	12	4.08333	408.333	3	1	6	93	52
2007	Mixed	68	Janus	Tim	M	43	4	12	3.58333	358.333	4	2	10	94	78
2007	Mixed	138	Thomas	Sonya	F	39	5	12	3.25	325	5	5	15	95	99
2007	Mixed	128	Simpson	Chip	M	35	6	12	2.91667	291.667	7	1	1	96	129
2007	Mixed	120	Schodt	Bob	M	35	7	12	2.91667	291.667	6	1	1	97	129
2007	Mixed	79	LeFevre	Rich	M	31	8	12	2.58333	258.333	8	4	8	98	175
2007	Mixed	65	Hunt	Hall	M	29	9	12	2.41667	241.667	9	1	3	99	196
2007	Mixed	77	Lee	Juliet	F	26	10	12	2.16667	216.667	10	1	13	100	223
2007	Mixed	15	Boone	Dale	M	25	11	12	2.08333	208.333	11	1	1	101	237
2007	Mixed	102	Philbin	Pat	M	24	12	12	2	200	12	2	3	102	244
2007	Mixed	32	Conti	Crazy Legs	M	23	13	12	1.91667	191.667	13	3	8	103	257
2007	Mixed	36	Denmark	Erik	M	23	14	12	1.91667	191.667	14	1	11	104	257
2007	Mixed	20	Brown	Tim	M	22	15	12	1.83333	183.333	15	4	3	105	269
2007	Mixed	109	Rios	Arturo	M	21	16	12	1.75	175	16	1	2	106	278
2008	Mixed	26	Chestnut	Joey	M	59	1	10	5.9	590	1	4	15	107	15
2008	Mixed	73	Kobayashi	Takeru	M	59	2	10	5.9	590	2	8	9	108	15
2008	Mixed	68	Janus	Tim	M	42	3	10	4.2	420	3	3	10	109	44
2008	Mixed	10	Bertoletti	Pat	M	38	4	10	3.8	380	4	2	6	110	61
2008	Mixed	138	Thomas	Sonya	F	34	5	10	3.4	340	5	6	15	111	82
2008	Mixed	65	Hunt	Hall	M	30	6	10	3	300	6	2	3	112	120
2008	Mixed	126	Shoudt	Bob	M	30	7	10	3	300	7	1	6	113	120
2008	Mixed	77	Lee	Juliet	F	29	8	10	2.9	290	8	2	13	114	131
2008	Mixed	36	Denmark	Erik	M	28	9	10	2.8	280	9	2	11	115	141
2008	Mixed	123	Shibayama	Juris	M	28	10	10	2.8	280	10	1	1	116	141
2008	Mixed	14	Booker	Eric	M	25.5	11	10	2.55	255	11	6	15	117	177
2008	Mixed	141	Vandam	Patrick	M	25	12	10	2.5	250	13	1	1	118	181
2008	Mixed	79	LeFevre	Rich	M	25	13	10	2.5	250	12	5	8	119	181
2008	Mixed	32	Conti	Crazy Legs	M	24	14	10	2.4	240	14	4	8	120	200
2008	Mixed	52	Goldstein	Allen	M	21	15	10	2.1	210	15	2	2	121	230
2008	Mixed	20	Brown	Tim	M	20	16	10	2	200	16	5	3	122	244
2008	Mixed	102	Philbin	Pat	M	19	17	10	1.9	190	17	3	3	123	261
2008	Mixed	12	Biller	Nathan	M	18.5	18	10	1.85	185	18	2	1	124	267
2008	Mixed	34	Davekos	Pete	M	18	19	10	1.8	180	19	1	5	125	274
2008	Mixed	109	Rios	Arturo	M	16	20	10	1.6	160	20	2	2	126	303
2008	Mixed	114	Ross	Kevin	M	14	21	10	1.4	140	21	1	1	127	331
2009	Mixed	26	Chestnut	Joey	M	68	1	10	6.8	680	1	5	15	128	6
2009	Mixed	73	Kobayashi	Takeru	M	64.5	2	10	6.45	645	2	9	9	129	8
2009	Mixed	10	Bertoletti	Pat	M	55	3	10	5.5	550	3	3	6	130	18
2009	Mixed	68	Janus	Tim	M	53	4	10	5.3	530	4	4	10	131	21
2009	Mixed	126	Shoudt	Bob	M	41.75	5	10	4.175	417.5	5	2	6	132	46
2009	Mixed	138	Thomas	Sonya	F	41	6	10	4.1	410	6	7	15	133	49
2009	Mixed	65	Hunt	Hall	M	38.5	7	10	3.85	385	7	3	3	134	59
2009	Mixed	36	Denmark	Erik	M	38	8	10	3.8	380	8	3	11	135	61
2009	Mixed	77	Lee	Juliet	F	34	9	10	3.4	340	9	3	13	136	82
2009	Mixed	14	Booker	Eric	M	30	10	10	3	300	10	7	15	137	120
2009	Mixed	20	Brown	Tim	M	30	11	10	3	300	11	1	3	138	120
2009	Mixed	105	Reeves	Jim	M	28.5	12	10	2.85	285	12	2	4	139	137
2009	Mixed	32	Conti	Crazy Legs	M	25	13	10	2.5	250	13	5	8	140	181
2009	Mixed	34	Davekos	Pete	M	25	14	10	2.5	250	14	2	5	141	181
2009	Mixed	55	Gordon	Sean	M	25	15	10	2.5	250	15	1	5	142	181
2009	Mixed	83	Marquez	Marco	M	23	16	10	2.3	230	16	1	1	143	207
2009	Mixed	31	Collins	Micah	M	21	17	10	2.1	210	17	1	2	144	230
2009	Mixed	23	Camerini	Franko	M	14	18	10	1.4	140	18	1	1	145	331
2009	Mixed	29	Coccodrilli	Bob	M	14	19	10	1.4	140	19	1	1	146	331
2010	Mixed	26	Chestnut	Joey	M	54	1	10	5.4	540	1	6	15	147	20
2010	Mixed	68	Janus	Tim	M	45	2	10	4.5	450	2	5	10	148	34
2010	Mixed	10	Bertoletti	Pat	M	37	3	10	3.7	370	3	4	6	149	70
2010	Mixed	138	Thomas	Sonya	F	36	4	10	3.6	360	4	8	15	150	73
2010	Mixed	126	Shoudt	Bob	M	34	5	10	3.4	340	5	3	6	151	82
2010	Mixed	36	Denmark	Erik	M	32	6	10	3.2	320	6	4	11	152	100
2010	Mixed	20	Brown	Tim	M	31	7	10	3.1	310	7	2	3	153	107
2010	Mixed	52	Goldstein	Allen	M	28	8	10	2.8	280	8	3	2	154	141
2010	Mixed	77	Lee	Juliet	F	27	9	10	2.7	270	10	4	13	155	153
2010	Mixed	13	Bonson	Ben	M	27	10	10	2.7	270	9	1	1	156	153
2010	Mixed	55	Gordon	Sean	M	26.5	11	10	2.65	265	11	2	5	157	166
2010	Mixed	34	Davekos	Pete	M	24	12	10	2.4	240	13	3	5	158	200
2010	Mixed	14	Booker	Eric	M	24	13	10	2.4	240	12	8	15	159	200
2010	Mixed	32	Conti	Crazy Legs	M	20	14	10	2	200	14	6	8	160	244
2010	Mixed	9	Beard	Bryan	M	15.5	15	10	1.55	155	15	1	1	161	317
2010	Mixed	2	Adams	Kris		11	16	10	1.1	110	16	1	1	162	360
2011	Mens	26	Chestnut	Joey	M	62	1	10	6.2	620	1	7	15	163	10
2011	Womens	138	Thomas	Sonya	F	40	1	10	4	400	4	9	15	164	54
2011	Mens	10	Bertoletti	Pat	M	53	2	10	5.3	530	2	5	6	165	21
2011	Womens	77	Lee	Juliet	F	29.5	2	10	2.95	295	8	5	13	166	127
2011	Mens	68	Janus	Tim	M	45	3	10	4.5	450	3	6	10	167	34
2011	Womens	140	Torres	Stephanie	F	28.5	3	10	2.85	285	9	1	1	168	137
2011	Womens	82	Lesco	Michelle	F	20	4	10	2	200	10	1	9	169	244
2011	Mens	126	Shoudt	Bob	M	39	4	10	3.9	390	5	4	6	170	57
2011	Mens	55	Gordon	Sean	M	34	5	10	3.4	340	6	3	5	171	82
2011	Womens	87	Mele	Larell Marie	F	16	5	10	1.6	160	11	1	9	172	303
2011	Mens	130	Stonie	Matt	M	34	6	10	3.4	340	7	1	8	173	82
2012	Mens	26	Chestnut	Joey	M	68	1	10	6.8	680	1	8	15	174	6
2012	Womens	138	Thomas	Sonya	F	45	1	10	4.5	450	6	10	15	175	34
2012	Mens	68	Janus	Tim	M	52.25	2	10	5.225	522.5	2	7	10	176	25
2012	Womens	77	Lee	Juliet	F	33	2	10	3.3	330	8	6	13	177	94
2012	Mens	10	Bertoletti	Pat	M	51	3	10	5.1	510	3	6	6	178	26
2012	Womens	82	Lesco	Michelle	F	25.5	3	10	2.55	255	15	2	9	179	177
2012	Womens	17	Boxberger	Merideth	F	21.5	4	10	2.15	215	17	1	6	180	225
2012	Mens	130	Stonie	Matt	M	46	4	10	4.6	460	4	2	8	181	32
2012	Womens	87	Mele	Larell Marie	F	21.25	5	10	2.125	212.5	18	2	9	182	228
2012	Mens	126	Shoudt	Bob	M	45	5	10	4.5	450	5	5	6	183	34
2012	Womens	45	Edible	Maria	F	18.5	6	10	1.85	185	20	1	1	184	267
2012	Mens	90	Morgan	Adrian	M	35	6	10	3.5	350	7	1	8	185	80
2012	Womens	6	Anderson	Nicole	F	16	7	10	1.6	160	21	1	1	186	303
2012	Mens	36	Denmark	Erik	M	32	7	10	3.2	320	9	5	11	187	100
2012	Mens	55	Gordon	Sean	M	32	8	10	3.2	320	10	4	5	188	100
2012	Womens	84	Martin	Dee	F	9.5	8	10	0.95	95	23	1	1	189	378
2012	Mens	31	Collins	Micah	M	31	9	10	3.1	310	11	2	2	190	107
2012	Womens	108	Ricasa	Neslie	F	9	9	10	0.9	90	24	1	3	191	380
2012	Womens	16	Bowers	Mary	F	8.5	10	10	0.85	85	25	1	7	192	385
2012	Mens	20	Brown	Tim	M	30.5	10	10	3.05	305	12	3	3	193	119
2012	Mens	34	Davekos	Pete	M	28	11	10	2.8	280	13	4	5	194	141
2012	Womens	131	Subich	Theresa	F	7	11	10	0.7	70	26	1	1	195	406
2012	Mens	14	Booker	Eric	M	25.5	12	10	2.55	255	14	9	15	196	177
2012	Womens	33	Davekos	Mia	F	6	12	10	0.6	60	27	1	1	197	416
2012	Womens	93	Nemunaitis	Molly	F	5.5	13	10	0.55	55	28	1	1	198	422
2012	Mens	118	Salem	Yasir	M	25	13	10	2.5	250	16	1	6	199	181
2012	Mens	32	Conti	Crazy Legs	M	20	14	10	2	200	19	7	8	200	244
2012	Womens	37	Deregla	Janice	F	3	14	10	0.3	30	29	1	1	201	427
2012	Mens	142	Vilinsky	Lee	M	15	15	10	1.5	150	22	1	1	202	320
2013	Mens	26	Chestnut	Joey	M	69	1	10	6.9	690	1	9	15	203	5
2013	Womens	138	Thomas	Sonya	F	36.75	1	10	3.675	367.5	6	11	15	204	72
2013	Womens	77	Lee	Juliet	F	36	2	10	3.6	360	7	7	13	205	73
2013	Mens	130	Stonie	Matt	M	51	2	10	5.1	510	2	3	8	206	26
2013	Mens	68	Janus	Tim	M	50	3	10	5	500	3	8	10	207	28
2013	Womens	82	Lesco	Michelle	F	27.5	3	10	2.75	275	13	3	9	208	151
2013	Womens	17	Boxberger	Merideth	F	26	4	10	2.6	260	15	2	6	209	168
2013	Mens	126	Shoudt	Bob	M	39.75	4	10	3.975	397.5	4	6	6	210	56
2013	Womens	87	Mele	Larell Marie	F	21	5	10	2.1	210	20	3	9	211	230
2013	Mens	90	Morgan	Adrian	M	38	5	10	3.8	380	5	2	8	212	61
2013	Mens	97	Osthoff	Aaron	M	31	6	10	3.1	310	9	1	2	213	107
2013	Womens	108	Ricasa	Neslie	F	14	6	10	1.4	140	21	2	3	214	331
2013	Womens	16	Bowers	Mary	F	10	7	10	1	100	22	2	7	215	372
2013	Mens	22	Butler	Jeff	M	31	7	10	3.1	310	8	1	2	216	107
2013	Womens	106	Reiehman	Laura	F	6	8	10	0.6	60	25	1	1	217	416
2013	Mens	118	Salem	Yasir	M	30	8	10	3	300	10	2	6	218	120
2013	Womens	40	DiBenedetto	Prudence	F	6	9	10	0.6	60	24	1	2	219	416
2013	Mens	98	Owens	Marcos	M	29	9	10	2.9	290	11	2	1	220	131
2013	Mens	36	Denmark	Erik	M	28	10	10	2.8	280	12	6	11	221	141
2013	Mens	85	Martinez	Pablo	M	27	11	10	2.7	270	14	1	6	222	153
2013	Mens	111	Rodriguez	Juan	M	26	12	10	2.6	260	16	1	7	223	168
2013	Mens	34	Davekos	Pete	M	25	13	10	2.5	250	17	5	5	224	181
2013	Mens	59	Hartman	Ronnie	M	22	14	10	2.2	220	18	1	4	225	215
2013	Mens	14	Booker	Eric	M	21	15	10	2.1	210	19	10	15	226	230
2013	Mens	75	Kyriazis	Christos	M	9	16	10	0.9	90	23	1	1	227	380
2014	Mens	26	Chestnut	Joey	M	61	1	10	6.1	610	1	10	15	228	12
2014	Womens	132	Sudo	Miki	F	34	1	10	3.4	340	6	1	3	229	82
2014	Mens	130	Stonie	Matt	M	56	2	10	5.6	560	2	4	8	230	17
2014	Womens	138	Thomas	Sonya	F	27.75	2	10	2.775	277.5	9	12	15	231	150
2014	Mens	68	Janus	Tim	M	44	3	10	4.4	440	3	9	10	232	41
2014	Womens	82	Lesco	Michelle	F	27	3	10	2.7	270	10	4	9	233	153
2014	Mens	36	Denmark	Erik	M	34	4	10	3.4	340	4	7	11	234	82
2014	Womens	77	Lee	Juliet	F	23	4	10	2.3	230	13	8	13	235	207
2014	Womens	17	Boxberger	Merideth	F	18	5	10	1.8	180	16	3	6	236	274
2014	Mens	42	Dudzinski	Brian	M	34	5	10	3.4	340	5	1	4	237	82
2014	Womens	87	Mele	Larell Marie	F	14	6	10	1.4	140	19	4	9	238	331
2014	Mens	111	Rodriguez	Juan	M	32	6	10	3.2	320	7	2	7	239	100
2014	Womens	78	LeFevre	Carlene	F	11	7	10	1.1	110	20	3	5	240	360
2014	Mens	90	Morgan	Adrian	M	29	7	10	2.9	290	8	3	8	241	131
2014	Mens	98	Owens	Marcos	M	26	8	10	2.6	260	11	3	1	242	168
2014	Womens	108	Ricasa	Neslie	F	10	8	10	1	100	23	3	3	243	372
2014	Mens	14	Booker	Eric	M	25	9	10	2.5	250	12	11	15	244	181
2014	Womens	16	Bowers	Mary	F	9	9	10	0.9	90	24	3	7	245	380
2014	Mens	118	Salem	Yasir	M	19.75	10	10	1.975	197.5	14	3	6	246	254
2014	Womens	145	Wigginton	Marlene	F	8.5	10	10	0.85	85	25	1	3	247	385
2014	Womens	74	Kulig	Nicole	F	7.5	11	10	0.75	75	26	1	1	248	405
2014	Mens	97	Osthoff	Aaron	M	19.5	11	10	1.95	195	15	2	2	249	255
2014	Mens	85	Martinez	Pablo	M	17	12	10	1.7	170	17	2	6	250	283
2014	Womens	112	Rodriguez	Nicole	F	7	12	10	0.7	70	27	1	1	251	406
2014	Womens	19	Bromann	Val	F	3	13	10	0.3	30	28	1	1	252	427
2014	Mens	59	Hartman	Ronnie	M	14	13	10	1.4	140	18	2	4	253	331
2014	Mens	55	Gordon	Sean	M	10	14	10	1	100	22	5	5	254	372
2014	Mens	24	Chanyau	Haracio	M	10	15	10	1	100	21	1	1	255	372
2014	Mens	124	Shirlow	Colin	M	3	16	10	0.3	30	29	1	1	256	427
2015	Mens	130	Stonie	Matt	M	62	1	10	6.2	620	1	5	8	257	10
2015	Womens	132	Stonie	Miki	F	38	1	10	3.8	380	3	2	3	258	61
2015	Mens	26	Chestnut	Joey	M	60	2	10	6	600	2	11	15	259	13
2015	Womens	138	Thomas	Sonya	F	31	2	10	3.1	310	7	13	15	260	107
2015	Mens	68	Janus	Tim	M	35.5	3	10	3.55	355	4	10	10	261	79
2015	Womens	77	Lee	Juliet	F	27.5	3	10	2.75	275	11	9	13	262	151
2015	Mens	36	Denmark	Erik	M	33	4	10	3.3	330	5	8	11	263	94
2015	Womens	82	Lesco	Michelle	F	26	4	10	2.6	260	12	5	9	264	168
2015	Womens	87	Mele	Larell Marie	F	16.75	5	10	1.675	167.5	20	5	9	265	288
2015	Mens	90	Morgan	Adrian	M	31	5	10	3.1	310	6	4	8	266	107
2015	Womens	17	Boxberger	Merideth	F	16.5	6	10	1.65	165	21	4	6	267	299
2015	Mens	118	Salem	Yasir	M	30	6	10	3	300	8	4	6	268	120
2015	Mens	47	Esper	Geoffrey	M	29.5	7	10	2.95	295	9	1	5	269	127
2015	Womens	151	Zisser	Nela	F	16	7	10	1.6	160	23	1	2	270	303
2015	Womens	50	Gioia	Daniella	F	15	8	10	1.5	150	24	1	3	271	320
2015	Mens	111	Rodriguez	Juan	M	28	8	10	2.8	280	10	3	7	272	141
2015	Womens	5	Alexander	BeeJay	F	13	9	10	1.3	130	25	1	2	273	342
2015	Mens	14	Booker	Eric	M	24.5	9	10	2.45	245	13	12	15	274	195
2015	Womens	78	LeFevre	Carlene	F	11	10	10	1.1	110	26	4	5	275	360
2015	Mens	85	Martinez	Pablo	M	22	10	10	2.2	220	14	3	6	276	215
2015	Mens	64	Hendry	Steve	M	21.75	11	10	2.175	217.5	15	1	3	277	222
2015	Womens	117	Ryder	Lesley	F	10.5	11	10	1.05	105	27	1	1	278	367
2015	Mens	32	Conti	Crazy Legs	M	19.5	12	10	1.95	195	16	8	8	279	255
2015	Womens	86	McClurg	Liz	F	8.5	12	10	0.85	85	28	1	2	280	385
2015	Womens	16	Bowers	Mary	F	8	13	10	0.8	80	29	4	7	281	392
2015	Mens	42	Dudzinski	Brian	M	19	13	10	1.9	190	17	2	4	282	261
2015	Mens	96	Oji	Gideon	M	19	14	10	1.9	190	18	1	5	283	261
2015	Womens	99	Pactor	Crystin	F	8	14	10	0.8	80	30	1	1	284	392
2015	Mens	22	Butler	Jeff	M	17	15	10	1.7	170	19	2	2	285	283
2015	Womens	145	Wigginton	Marlene	F	8	15	10	0.8	80	31	2	3	286	392
2015	Mens	12	Biller	Nathan	M	16	16	10	1.6	160	22	1	1	287	303
2015	Womens	62	Hendry	Angie	F	5	16	10	0.5	50	32	1	1	288	423
2016	Mens	26	Chestnut	Joey	M	70	1	10	7	700	1	12	15	289	4
2016	Womens	132	Sudo	Miki	F	38	1	10	3.8	380	5	3	3	290	61
2016	Mens	130	Stonie	Matt	M	53	2	10	5.3	530	2	6	8	291	21
2016	Womens	138	Thomas	Sonya	F	35	2	10	3.5	350	8	14	15	292	80
2016	Mens	28	Cincotti	Carmen	M	42	3	10	4.2	420	3	1	3	293	44
2016	Womens	77	Lee	Juliet	F	27	3	10	2.7	270	13	10	13	294	153
2016	Womens	82	Lesco	Michelle	F	27	4	10	2.7	270	14	6	9	295	153
2016	Mens	96	Oji	Gideon	M	38	4	10	3.8	380	4	2	5	296	61
2016	Womens	5	Alexander	BeeJay	F	17.5	5	10	1.75	175	18	2	2	297	278
2016	Mens	47	Esper	Geoffrey	M	37.5	5	10	3.75	375	6	2	5	298	67
2016	Mens	90	Morgan	Adrian	M	36	6	10	3.6	360	7	5	8	299	73
2016	Womens	151	Zisser	Nela	F	16.75	6	10	1.675	167.5	19	2	2	300	288
2016	Womens	17	Boxberger	Merideth	F	16	7	10	1.6	160	20	5	6	301	303
2016	Mens	118	Salem	Yasir	M	31	7	10	3.1	310	10	5	6	302	107
2016	Mens	36	Denmark	Erik	M	31	8	10	3.1	310	9	9	11	303	107
2016	Womens	38	DeVita	Sophia	F	15.5	8	10	1.55	155	22	1	4	304	317
2016	Mens	79	LeFevre	Rich	M	29	9	10	2.9	290	11	6	8	305	131
2016	Womens	87	Mele	Larell Marie	F	15	9	10	1.5	150	23	6	9	306	320
2016	Mens	98	Owens	Marcos	M	28	10	10	2.8	280	12	1	1	307	141
2016	Womens	149	Zapata	Kassandra	F	13.5	10	10	1.35	135	24	1	3	308	340
2016	Womens	50	Gioia	Daniella	F	12.5	11	10	1.25	125	25	2	3	309	346
2016	Mens	111	Rodriguez	Juan	M	27	11	10	2.7	270	15	4	7	310	153
2016	Mens	14	Booker	Eric	M	25	12	10	2.5	250	16	13	15	311	181
2016	Womens	16	Bowers	Mary	F	8.5	12	10	0.85	85	27	5	7	312	385
2016	Mens	42	Dudzinski	Brian	M	24	13	10	2.4	240	17	3	4	313	200
2016	Womens	43	Dudzinski	Noelle	F	7.75	13	10	0.775	77.5	28	1	1	314	403
2016	Womens	7	Andrews	Hilary	F	7	14	10	0.7	70	29	1	1	315	406
2016	Mens	121	Schuster	Steve	M	16	14	10	1.6	160	21	1	1	316	303
2016	Mens	71	Katz	Dan	M	12	15	10	1.2	120	26	1	1	317	356
2016	Womens	101	Petra	Elizabeth	F	4.5	15	10	0.45	45	30	1	1	318	425
2017	Mens	26	Chestnut	Joey	M	72	1	10	7.2	720	1	13	15	319	2
2017	Womens	132	Sudo	Miki	F	41	1	10	4.1	410	5	4	3	320	49
2017	Mens	28	Cincotti	Carmen	M	60	2	10	6	600	2	2	3	321	13
2017	Womens	82	Lesco	Michelle	F	32	2	10	3.2	320	11	7	9	322	100
2017	Mens	130	Stonie	Matt	M	48	3	10	4.8	480	3	7	8	323	30
2017	Womens	138	Thomas	Sonya	F	30	3	10	3	300	12	15	15	324	120
2017	Mens	47	Esper	Geoffrey	M	44.5	4	10	4.45	445	4	3	5	325	40
2017	Womens	77	Lee	Juliet	F	25	4	10	2.5	250	15	11	13	326	181
2017	Mens	18	Breeden	Darren	M	38.5	5	10	3.85	385	6	1	3	327	59
2017	Womens	38	DeVita	Sophia	F	18	5	10	1.8	180	24	2	4	328	274
2017	Womens	17	Boxberger	Merideth	F	17	6	10	1.7	170	25	6	6	329	283
2017	Mens	96	Oji	Gideon	M	36	6	10	3.6	360	7	3	5	330	73
2017	Womens	50	Gioia	Daniella	F	17	7	10	1.7	170	26	3	3	331	283
2017	Mens	90	Morgan	Adrian	M	34	7	10	3.4	340	8	6	8	332	82
2017	Womens	107	Reinecke	Sarah	F	15	8	10	1.5	150	28	1	3	333	320
2017	Mens	111	Rodriguez	Juan	M	33	8	10	3.3	330	9	5	7	334	94
2017	Womens	87	Mele	Larell Marie	F	14	9	10	1.4	140	30	7	9	335	331
2017	Mens	118	Salem	Yasir	M	33	9	10	3.3	330	10	6	6	336	94
2017	Mens	79	LeFevre	Rich	M	29	10	10	2.9	290	13	7	8	337	131
2017	Womens	149	Zapata	Kassandra	F	13	10	10	1.3	130	31	2	3	338	342
2017	Mens	36	Denmark	Erik	M	25	11	10	2.5	250	14	10	11	339	181
2017	Womens	78	LeFevre	Carlene	F	12	11	10	1.2	120	32	5	5	340	356
2017	Womens	16	Bowers	Mary	F	8	12	10	0.8	80	33	6	7	341	392
2017	Mens	85	Martinez	Pablo	M	23	12	10	2.3	230	16	4	6	342	207
2017	Mens	64	Hendry	Steve	M	22.5	13	10	2.25	225	17	2	3	343	212
2017	Womens	86	McClurg	Liz	F	8	13	10	0.8	80	34	2	2	344	392
2017	Mens	14	Booker	Eric	M	22	14	10	2.2	220	18	14	15	345	215
2017	Womens	116	Rovtar	Rene	F	8	14	10	0.8	80	35	1	3	346	392
2017	Mens	88	Miller	Josh	M	22	15	10	2.2	220	19	1	1	347	215
2017	Womens	145	Wigginton	Marlene	F	8	15	10	0.8	80	36	3	3	348	392
2017	Womens	100	Palmer	Stevie	F	7.75	16	10	0.775	77.5	37	1	1	349	403
2017	Mens	105	Reeves	Jim	M	22	16	10	2.2	220	20	3	4	350	215
2017	Womens	11	Bethea	Deborah	F	6	17	10	0.6	60	38	1	1	351	416
2017	Mens	67	Jacobs	Derek	M	20.5	17	10	2.05	205	21	1	2	352	241
2017	Womens	80	Leppert-Simenauer	Danielle	F	6	18	10	0.6	60	39	1	1	353	416
2017	Mens	92	Neave	Juan	M	20	18	10	2	200	23	1	3	354	244
2017	Mens	42	Dudzinski	Brian	M	20	19	10	2	200	22	4	4	355	244
2017	Mens	30	Cohen	Matthew	M	16	20	10	1.6	160	27	1	1	356	303
2017	Mens	46	Esmaeelzadeh	Pedram	M	14.5	21	10	1.45	145	29	1	1	357	328
2018	Mens	26	Chestnut	Joey	M	74	1	10	7.4	740	1	14	15	358	1
2018	Womens	132	Sudo	Miki	F	37	1	10	3.7	370	7	5	3	359	70
2018	Mens	28	Cincotti	Carmen	M	64	2	10	6.4	640	2	3	3	360	9
2018	Womens	82	Lesco	Michelle	F	28	2	10	2.8	280	13	8	9	361	141
2018	Mens	18	Breeden	Darren	M	43	3	10	4.3	430	3	2	3	362	43
2018	Womens	77	Lee	Juliet	F	25	3	10	2.5	250	17	12	13	363	181
2018	Mens	47	Esper	Geoffrey	M	41	4	10	4.1	410	4	4	5	364	49
2018	Womens	107	Reinecke	Sarah	F	21	4	10	2.1	210	24	2	3	365	230
2018	Womens	87	Mele	Larell Marie	F	19	5	10	1.9	190	26	8	9	366	261
2018	Mens	130	Stonie	Matt	M	40	5	10	4	400	5	8	8	367	54
2018	Womens	38	DeVita	Sophia	F	14	6	10	1.4	140	27	3	4	368	331
2018	Mens	96	Oji	Gideon	M	37.5	6	10	3.75	375	6	4	5	369	67
2018	Womens	25	Chen	Jingru	F	13	7	10	1.3	130	28	1	1	370	342
2018	Mens	133	Suzuki	Max	M	34	7	10	3.4	340	8	1	2	371	82
2018	Mens	90	Morgan	Adrian	M	33	8	10	3.3	330	9	7	8	372	94
2018	Womens	149	Zapata	Kassandra	F	12	8	10	1.2	120	29	3	3	373	356
2018	Womens	104	Prettyman	Katie	F	11	9	10	1.1	110	30	1	2	374	360
2018	Mens	111	Rodriguez	Juan	M	32	9	10	3.2	320	10	6	7	375	100
2018	Womens	143	Walker	Joceyln	F	10.5	10	10	1.05	105	31	1	2	376	367
2018	Mens	144	Wehry	Nick	M	31	10	10	3.1	310	11	1	2	377	107
2018	Womens	41	Dickerson	Tracie	F	8	11	10	0.8	80	32	1	1	378	392
2018	Mens	79	LeFevre	Rich	M	28	11	10	2.8	280	12	8	8	379	141
2018	Mens	66	Jacobes	Derek	M	27	12	10	2.7	270	14	1	1	380	153
2018	Womens	136	Tesch	Kathryn	F	8	12	10	0.8	80	33	1	2	381	392
2018	Mens	92	Neave	Juan	M	27	13	10	2.7	270	15	2	3	382	153
2018	Womens	139	Titus	Holly	F	8	13	10	0.8	80	34	1	2	383	392
2018	Mens	60	Hazzard	Matthew	M	25	14	10	2.5	250	16	1	1	384	181
2018	Womens	103	Powell	Brittany	F	7	14	10	0.7	70	35	1	1	385	406
2018	Mens	27	Chiger	George	M	24.75	15	10	2.475	247.5	18	1	2	386	194
2018	Womens	116	Rovtar	Rene	F	6.5	15	10	0.65	65	36	2	3	387	413
2018	Mens	63	Hendry	Hendry	M	24	16	10	2.4	240	19	1	1	388	200
2018	Womens	134	Szeles	Brynn	F	6.5	16	10	0.65	65	37	1	1	389	413
2018	Mens	85	Martinez	Pablo	M	24	17	10	2.4	240	20	5	6	390	200
2018	Womens	115	Rovtar	Kristina	F	5	17	10	0.5	50	38	1	1	391	423
2018	Mens	36	Denmark	Erik	M	21.5	18	10	2.15	215	21	11	11	392	225
2018	Womens	40	DiBenedetto	Prudence	F	4	18	10	0.4	40	39	2	2	393	426
2018	Mens	59	Hartman	Ronnie	M	21.5	19	10	2.15	215	22	3	4	394	225
2018	Mens	105	Reeves	Jim	M	21	20	10	2.1	210	23	4	4	395	230
2018	Mens	14	Booker	Eric	M	20	21	10	2	200	25	15	15	396	244
2019	Mens	26	Chestnut	Joey	M	71	1	10	7.1	710	1	15	15	397	3
2019	Womens	132	Sudo	Miki	F	31	1	10	3.1	310	9	6	3	398	107
2019	Mens	18	Breeden	Darren	M	50	2	10	5	500	2	3	3	399	28
2019	Womens	82	Lesco	Michelle	F	26.5	2	10	2.65	265	15	9	9	400	166
2019	Mens	47	Esper	Geoffrey	M	47	3	10	4.7	470	3	5	5	401	31
2019	Womens	77	Lee	Juliet	F	23	3	10	2.3	230	19	13	13	402	207
2019	Womens	107	Reinecke	Sarah	F	23	3	10	2.3	230	19	3	3	403	207
2019	Mens	130	Stonie	Matt	M	46	4	10	4.6	460	4	9	8	404	32
2019	Womens	87	Mele	Larell Marie	F	18	5	10	1.8	180	23	9	9	405	274
2019	Mens	133	Suzuki	Max	M	39	5	10	3.9	390	5	2	2	406	57
2019	Womens	38	DeVita	Sophia	F	14	6	10	1.4	140	24	4	4	407	331
2019	Mens	144	Wehry	Nick	M	36	6	10	3.6	360	6	2	2	408	73
2019	Mens	60	Hazzard	Matthew	M	34	7	10	3.4	340	7	2	1	409	82
2019	Mens	96	Oji	Gideon	M	34	7	10	3.4	340	7	5	5	410	82
2019	Womens	104	Prettyman	Katie	F	12.5	7	10	1.25	125	25	2	2	411	346
2019	Womens	139	Titus	Holly	F	11	8	10	1.1	110	26	2	2	412	360
2019	Mens	92	Neave	Juan	M	29	9	10	2.9	290	10	3	3	413	131
2019	Womens	136	Tesch	Kathryn	F	10.5	9	10	1.05	105	27	2	2	414	367
2019	Womens	148	Wong	Kelly	F	10.5	9	10	1.05	105	27	1	1	415	367
2019	Mens	59	Hartman	Ronnie	M	28.5	10	10	2.85	285	11	4	4	416	137
2019	Mens	89	Moran	Adam	M	28.5	10	10	2.85	285	11	1	1	417	137
2019	Womens	143	Walker	Joceyln	F	9	11	10	0.9	90	29	2	2	418	380
2019	Womens	16	Bowers	Mary	F	8	12	10	0.8	80	30	7	7	419	392
2019	Mens	67	Jacobs	Derek	M	27	12	10	2.7	270	13	2	2	420	153
2019	Mens	85	Martinez	Pablo	M	27	12	10	2.7	270	13	6	6	421	153
2019	Womens	51	Goldberg	Juliet	F	7	13	10	0.7	70	31	1	1	422	406
2019	Womens	116	Rovtar	Rene	F	7	13	10	0.7	70	31	3	3	423	406
2019	Mens	27	Chiger	George	M	26	14	10	2.6	260	16	2	2	424	168
2019	Mens	90	Morgan	Adrian	M	26	14	10	2.6	260	16	8	8	425	168
2019	Mens	111	Rodriguez	Juan	M	26	14	10	2.6	260	16	7	7	426	168
2019	Womens	147	Wong	Kat	F	6	15	10	0.6	60	33	1	1	427	416
2019	Mens	64	Hendry	Steve	M	22	17	10	2.2	220	21	3	3	428	215
2019	Mens	137	Thomas	Darien	M	22	17	10	2.2	220	21	1	1	429	215
